# Supplementary material for: Pituitary tissue-specific miR-7a-5p regulates FSH expression in rat anterior adenohypophyseal cells
Source: PeerJ. 2019 Apr 9;7:e6458. doi: 10.7717/peerj.6458 (PMC6461031; doi:10.7717/peerj.6458)
Supplement: Supplemental Information 2 [file peerj-07-6458-s002.xlsx]

## Sheet: Fig. 1
Fig. 1C
Raw data of relative Rluc/Luc ratio
	Fshb-WT+NC	Fshb-WT+rno-miR-186-5p	Fshb-Mut+NC	Fshb-Mut+rno-miR-186-5p
1	0.97817	0.659219	1.04255	1.01223
2	0.96287	0.621708	1.02832	0.909228
3	1.05896	0.63858	0.929133	0.863706
Ave	1	0.639836	1	0.928387
SD	0.0516304	0.018787	0.0617835	0.0760922
p value	a	b	a	a

## Sheet: Fig. 2
Fig. 2A
Raw data of relative expression of miRNAs at different developmental stages
	miR-7a
	15-day old	4-month old
1	0.903335	0.622316
	1.00231	0.575678
	1.10445	0.586777
2	1	0.604299
	1	0.764895
	1	0.575678
3	1	0.0919292
	1	0.11636
	1	0.146266
Ave	1.00112	0.4538
SD	0.05031	0.258508
p value	a	b
Fig. 2B
Raw data of relative expression of miRNAs in different tissues
	heart	pituitary	liver	spleen	lung	kidney	brain
1	0.882703	1275.34	0.204476	0.447941	3.68075	1.32869	13.4233
	0.97942	1348.06	0.170755	0.310652	4.65893	1.16473	14.0907
	1.15669	1592.05	0.257028	0.267407	3.81055	1.43396	13.2385
2	0.90125	1057.66	0.302848	0.431271	1.69349	0.304955	4.02782
	1.12506	1181.72	0.298679	0.452712	1.79005	0.300756	2.73208
	0.986233	1603.12	0.37285	0.530957	2.01391	0.385998	3.45815
3	1.02811	1398.83	0.728668	0.7457	1.73708	0.605696	6.63456
	0.959264	1438.15	0.436282	0.874583	2.32409	0.605696	4.56305
	1.01396	1509.65	0.439317	0.631418	2.08012	0.589134	5.6962
Ave	1.00363	1378.29	0.356767	0.521404	2.64322	0.746623	7.54048
SD	0.0914056	183.867	0.167976	0.198245	1.105	0.443633	4.67963

## Sheet: Fig. 3
Fig. 3B
Raw data of Flow cytometry analysis of rat anterior pituitary cells apoptosis
	NC			mimics			I-NC			inhibitors
	UR Gated (%)	LR Gated (%)	sum(UR+LR) Gated (%)	UR Gated (%)	LR Gated (%)	sum(UR+LR) Gated (%)	UR Gated (%)	LR Gated (%)	sum(UR+LR) Gated (%)	UR Gated (%)	LR Gated (%)	sum(UR+LR) Gated (%)
1	9.06	1.78	10.84	10.38	0.6	10.98	9.97	0.89	10.86	9.47	0.43	9.9
2	5.36	3.05	8.41	6.48	2.66	9.14	7.16	2.92	10.08	8.85	1.43	10.28
3	5.62	3	8.62	7.64	3.11	10.75	8.1	3.16	11.26	9.07	2.06	11.13
Ave (sum)			9.29			10.29			10.7333			10.4367
SD (sum)			1.34644			1.00255			0.600111			0.629788
Fig. 3C
Raw data of relative expression of miR-7a-5p
	NC	mimic	I-NC	inhibitor
1	1.01396	61.1099	0.99539	0.204948
	1.06437	72.6723	1.03766	0.225834
	0.926588	47.6146	0.968171	0.163044
2	1.04972	58.3502	1	0.259415
	1.06437	56.7546	0.942785	0.339936
	0.895025	59.5763	1.06069	0.197967
3	0.897095	53.9419	1.24545	0.0475855
	1.09682	60.2685	1.04729	0.0437876
	1.0163	49.9819	0.766664	0.039191
Ave	1.00269	57.8078	1.00712	0.169079
SD	0.0770776	7.26751	0.125439	0.106102
p value	b	a	b	c

## Sheet: Fig. 4
Fig. 4A
Raw data of relative expression of FSHb
	NC	siRNA
1	0.961483	0.00968522
	1.05946	0.0144779
	0.981686	0.0121744
2	1.04488	0.0192811
	0.968171	0.0182411
	0.988514	0.017498
3	1.03766	0.010501
	1.1434	0.010501
	0.842842	0.0115711
Ave	1.00312	0.0137701
SD	0.0829965	0.0037115
P value	a	b
Fig. 4B
Raw data of FSH secretion
	NC mimic	miR-7a-5p mimic
	7.49828	4.51206
	6.99196	4.98508
	6.61883	5.11366
Ave	7.03636	4.87026
SD	0.441403	0.31681
P value	a	b
Fig. 4C
Raw data of relative expression of FSHb
	NC	miR-7a-5p mimic	I-NC	miR-7a-5p inhibitor
1	1.01396	0.245989	1.00231	1.30737
	1.04247	0.249423	1.2086	1.45062
	0.946058	0.304955	0.825496	1.19472
2	1.02811	0.206374	1.29235	1.64338
	0.952638	0.191224	0.952638	1.57644
	1.02101	0.199344	0.812252	1.66632
3	0.92445	0.373712	1.00231	1.49831
	1.03288	0.524858	1.2086	1.67404
	1.04729	0.441351	0.825496	1.33176
Ave	1.00099	0.304137	1.01445	1.48255
SD	0.0466365	0.118348	0.183379	0.174164
p value	b	c	b	a
Fig. 4D
Raw data of FSH secretion
	NC mimic	miR-7a-5p mimic	NC inhibitor	miR-7a-5p inhibitor
	6.87452	3.31179	5.80266	9.88973
	5.65589	3.70722	5.62357	8.62357
	6.04563	3.8038	6.64449	9.84449
Ave	6.19202	3.6076	6.02357	9.4526
SD	0.622364	0.260697	0.545131	0.718312
P value	b	c	b	a
